# Supplementary material
Source: MDPI journal article supplement (https://www.mdpi.com/2073-4344/10/7/811)
Supplement: s1 [file s1]

**Support information**

2. Materials and Methods

*2.1. Catalysts preparation*

5.94g nickel chloride was dissolved in water, and then 9.58ml hypophosphorous acid was added under stirring condition at room temperature for 0.5h. After that, appropriate tripropylamine was added in that precursor to adjust pH to 7. Increasing the reaction temperature to 40℃, and then a volume of KBH4 solution was added into the mixture to triggers the reaction. Keep the solution under vigorous stirring at 40℃ for 3h and the black products were collected by vacuum filtration. Black products were washed several times with ammonia solution until filtrate became colorless, and then distilled water until the pH of filtrate was about 7. In the end, they were dried under vacuum for 3h at 70℃.

*2.2. Characterization methods and catalytic activity measurements*

**H2-TPR analysis:** H2-TPR was mainly used to investigate the reduction properties of samples. About 0.1 g catalyst (20–60 mesh) sandwiched by quartz wool, was loaded in a quartz tube. Samples were heated from room temperature to 200 ℃ with a rate of 10 ℃/min under Helium flow (30 mL/min). And then they were heated at 200 ℃ in the quartz tube for 30 min under helium for removing the water and other impurities. After cooling down to room temperature, the carrier gas was switched to a mixture of 10 vol.% H2/N2 (30 mL/min). In order to determine the position of reduction peaks, samples were heated from 30 ℃ up to 800 ℃ with the temperature rate of 10 ℃/min and TCD signals were recorded as a function of temperature.

**DSC analysis:** DSC was used to confirm the structural changes of nickel boride with temperature. And the sample was heated in alumina crucibles from room temperature to 800℃ at a rate of 10℃/min under high-purity nitrogen.

**Evaluation method:** The isomerization of n-hexane was carried out on a continuous flow fixed-bed stainless steel reactor (8 mm in diameter). At first, the temperature and H2 pressure were adjusted and stabilized to the desired values, and then n-hexane was fed into the reactor through a pump. The reactor effluent was cooled and the condensed liquid was collected. The liquid products were analyzed by a 6820 GC equipped with a FID and a Al2O3 capillary column (50m × 0.32mm). The relative retention was used as qualitative analysis, and the area normalization method was used as the quantitative analysis.

The conversion of n-hexane (X) was calculated according to the following equation:

X(%)= 100 (∑Ai-An-C6)/∑Ai (1)

where Ai and An-C6 are corrected chromatographic area for particular compound and for residual n-hexane. The selectivity (Si) and yield (Yi) to particular product were calculated according to Eqs. (2) and (3), respectively.

Si(%)= 100 Ai/(∑Ai-An-C6) (2)

Yi(%)= X×Si/100 (3)

**Figures:**

Figure S1. The stability of catalyst.





X: n-C6 conversion, S: selectivity to isomers (C5-C6), Y: yield of isomers(C5-C6).
